# Supplementary material
Source: Research Square preprint supplement (doi:10.21203/rs.3.rs-9957555/v1)
Supplement: Supplementary file 1 [file 2b40f5e4b54b445489d92ea0.xlsx]

## Sheet: ورقة1
Biosample Accession	Assembly	Sample	Year of isolation	Source	Country	mcr-9.1 location	ST	IS upstream	IS downstream	Context type	mcr-9.1 genetic environment	N50	Number of contings	Plasmid type
SAMN46777820	GCA_016070875.1	CFSAN080751	1982	Food	Canada	Predicted Chromosome	ST13	None	None	Ancestral	→ mcr-9.1	80.6 kb	125	IncFIB(pCTU3) , IncFII(pECLA) (pSDP9R)
SAMN46777811	GCA_016070755.1	CFSAN080747	1984	Food	Canada	Ambiguous	ST4	IS5/IS1182	None	Plasmid-associated	→ IS5/IS1182 → mcr-9.1 → wbuC	89 kb	126	IncFIB(pECLA)
SAMN46777797	GCA_002974915.1	MOD1_LR736	2004	Food	USA	Predicted Chromosome	ST1	IS5	IS481	Intermediate	IS5 → mcr-9.1 → wbuC → IS481	311.3 kb	51	No hit
SAMN46777824	GCF_003207135.1	CS-42	2006	Clinical	Canada	Predicted Chromosome	ST21	IS5	IS481	Complex	IS903 → mcr-9.1 → hypothetical → qseC ← qseB ← ISAzs36 ← hypothetical	367.7 kb	41	No hit
SAMN46777798	GCA_009938705.1	SC16	2011	Food	China	Predicted Plasmid	ST4	None	IS1, IS3 ,IS6	Plasmid-associated	wbuC ← mcr-9 → IS1 → IS3 → IS6	119.3 kb	146	rep_cluster
SAMN46777795	GCA_013186165.1	CE52	2010	Food	China	Predicted Chromosome	ST21	None	IS481	Complex	Hp-exeA ← qseB ← qseC → mcr-9.1 → IS481 → IS26	427.6 kb	33	No hit
SAMN46777806	GCA_002094505.1	cro810A3	2012	Food	China	Ambiguous	ST1	None	IS26, ISAzs36	Complex	S26 →hypothetical→ ISAzs36 → qseB→ qseC →hypothetical→ eptA ← mcr-9	22.8 kb	449	No hit
SAMN46777805	GCA_002977865.1	cro1489B1	2013	Food	China	Predicted Chromosome	ST8	IS903B	None	Ancestral	rssA → hypothetical ←mcr-9.1 ←IS903B	29.4 kb	456	Col(pHAD28,IncFIB(K)
SAMN46777796	GCA_002942245.1	MOD1_WNTSBCO4	2015	Food	USA	Predicted Chromosome	ST1	IS5	None	Intermediate	IS5 → mcr-9.1 → wbuC	241.9 kb	58	No hit
SAMN46777800	GCA_050262915.1	25MDFML003374-2A	2015	Food	USA	Predicted Chromosome	ST1	IS5 (IS903B)	None	Complex	IS5 (IS903B) → mcr-9.1 → wbuC ← qseC	532.2 kb	29	No hit
SAMN46777815	GCA_018348465.1	CH65	2025	Food	Chile	Predicted Chromosome	ST1	IS5	IS481*,IS26, IS5,IS1	Complex	IS5 → mcr-9.1 → wbuC ← qseC ← qseB ← ExeA ← IS481* ← IS26	232.9 kb	174	No hit
SAMN46777822	GCA_051913205.1	CRZK	2015	Clinical	China	Ambiguous	ST256	IS5/IS1182	None	Intermediate	IS5/IS1182 → MCR-9.1 → wbuC → hypothetical	46.1 kb	355	IncHI2 , IncHI2A
SAMN46777799	GCA_018348425.1	CH45	2016	Food	Chile	Predicted Chromosome	ST1	IS5	IS481,IS6,IS5,IS1	Complex	IS5 → mcr-9.1 → wbuC ← qseC-like	322 kb	114	Col(pHAD28
SAMN46777816	GCA_018348565.1	CH43	2016	Food	Chile	Predicted Chromosome	ST1	IS5	IS481*, IS26	Complex	IS5 → mcr-9.1 → wbuC ← qseC ← qseB ← ExeA ← IS481* ← IS26	263.2 kb	112	No hit
SAMN46777814	GCA_018348415.1	CH44	2016	Food	Chile	Predicted Chromosome	ST1	IS5	IS481*, IS26	Complex	IS26 → IS481* → ExeA → qseB → qseC ← wbuC ← mcr-9.1 ← IS5	309.6 kb	120	No hit
SAMN46777809	GCA_048159305.1	CS291	2017	Food	China	Ambiguous	ST4	IS1D/IS1R, ISEc17	ISAzs36	Plasmid-associated	ISAzs36 → qseB → qseC ← hypothetical ← mcr-9.1 → IS1D/IS1R ← ISEc17	39.1 kb	219	No hit
SAMN46777812	GCA_018348495.1	CH84	2017	Food	Chile	Predicted Chromosome	ST1	IS481*,IS2 ,IS5	IS5	Complex	← IS5 ← mcr-9.1 ← wbuC → qseC→ qseB → ExeA → IS481 *→ IS26 ← IS5	232.6 kb	120	No hit
SAMN46777817	GCA_048159225.1	CS6162	2017	Food	China	Predicted Chromosome	ST4	None	IS26, IS481	Complex	→ IS26 → hypothetical → IS481 → qseB → qseC ← hypothetical ← mcr-9.1	26.1 kb	332	IncFIB(pCTU3)
SAMN09426131	GCA_016576885.1	MOD1_CDCA3	2018	Not Provided	Canada	Predicted Chromosome	ST1	IS6	IS5	Complex	IS6 → wbuC → mcr-9.1 →IS5	380.5 kb	36	No hit
SAMN46777804	GCA_011605495.1	HA18074	2018	Food	China	Predicted Chromosome	ST1	IS5	IS481*,IS26	Complex	IS5 → mcr-9.1 → wbuC ← HAMP kinase ← Response regulator ← AAA ATPase ← IS481* ← IS26	561.8 kb	41	No hit
SAMN46777807	GCA_028628985.1	CFSAN129441	2022	Environmental	USA	Predicted Chromosome	ST1	IS5	None	Intermediate	IS5 → mcr-9.1→ wbuC	59 kb	160	No hit
SAMN46777821	GCA_052278595.1	bq	2022	Clinical	China	Plasmid	ST4	IS6	IS1,IS3,IS6	Plasmid-associated	IS6* — IS3 * — IS1B — mcr-9 — wbuC — qseC * — IS26	4.2 Mb	2	IncFIB.
SAMN35989163	GCA_030720945.1	S071-004	2023	Environmental	USA	Ambiguous	ST148	IS5	None	Intermediate	IS5 → mcr-9.1 → wbuC	555 kb	49	No hit
SAMN36714864	GCA_030720885.1	S053-001	2023	Environmental	USA	Predicted Chromosome	ST1	IS5	None	Intermediate	IS5 → mcr-9.1 → wbuC	407.6 kb	48	No hit
SAMN36770214	GCA_030720665.1	S054-001	2023	Environmental	USA	Predicted Chromosome	ST1	IS5	None	Intermediate	IS5 → mcr-9.1 → wbuC	418.2 kb	40	No hit
SAMN38447862	GCA_034408485.1	CFSAN135223	2023	Environmental	USA	Ambiguous	ST1	IS5	IS26, Tn*	Complex	IS5 → mcr-9.1 → wbuC → IS26 → Tn3*	246.4 kb	42	No hit
SAMN43389002	GCA_044710855.1	CFSAN138565	2024	Environmental	USA	Predicted Chromosome	ST1	None	IS481,IS26	Complex	Hp→ exeA → qseB → qseC→ wbuC→ mcr-9.1→ IS481→ IS26	144.7 kb	58	No hit
SAMN46777794	GCA_047685355.1	CFSAN140976	2024	Environmental	USA	Predicted Chromosome	ST1	IS5	None	Intermediate	IS5 – mcr-9.1 – wbuC	598.5 kb	25	No hit
SAMN46777819	GCA_035779775.1	1011-04	2024	Food	USA	Predicted Chromosome	ST13	None	None	Ancestral	→ mcr-9.1 → wbuC	97.3 kb	127	IncFII(pECLA)
SAMN46777801	GCA_050025055.1	25MDFML003369-3A	2025	Food	USA	Predicted Chromosome	ST1	IS5/IS1182,	IS481*, IS6, IS110	Complex	IS5 (IS1182) → mcr-9.1 → wbuC ← qseC ← qseB ← ExeA ← IS481* ← IS26 → IS110	280.1 kb	44	No hit
SAMN46777810	GCA_050024735.1	25MDFML003369-4A	2025	Food	USA	Ambiguous	ST1	IS903B	IS481*, IS26, IS110	Complex	← IS903B → mcr-9.1 → wbuC ← qseC-like ← qseB-like ← ExeA ← IS481* ← IS26 ← IS110	503.4 kb	37	No hit
SAMN46777803	GCA_049244605.1	CFSAN141625	2025	Food	Ireland	Ambiguous	ST1	None	IS481*, IS26, Tn3*	Complex	mcr-9.1 → wbuC ← qseC ← qseB ← ExeA ← IS481* ← IS26 → recombinase* → Tn3*	292.6 kb	53	No hit
SAMN46777813	GCA_048697375.1	CFSAN141446	2025	Food	Ireland	Ambiguous	ST1	IS5/IS1182	IS481*, IS26, Tn3*	Complex	IS5/IS1182 → mcr-9.1 → wbuC ← qseC-like ← qseB-like ← ExeA ← IS481* ← IS26 ← Recombinase* ← Tn3*	332.9 kb	50	No hit
SAMN46777808	GCA_050916475.1	KubGAU B-268	2025	Food	Russia	Predicted Chromosome	ST1	IS5/IS903	None	Complex	ISAzs36 → qseB → qseC ← hypothetical ← mcr-9.1 ← IS5/IS903	268.7 kb	48	Col(pHAD28)
SAMN46777818	GCA_051399495.1	CFSAN142785	2025	Food	Ireland	Predicted Chromosome	ST21	None	None	Complex	→ mcr-9.1→ wbuC ← qseC-like	191.5 kb	81	IncFIB(K) , IncFII(Yp)
SAMN46777802	GCA_051199485.1	25MDFML004503-1A	2025	Food	USA	Ambiguous	ST1	IS5,IS903B	IS481*,IS6 ,IS110, Is1B	Complex	IS903B → mcr-9 → wbuC ← qseC ← qseB ← ExeA ← IS481*← IS26 → IS110 → RelE/ParE → HTH ← IS1B	256.2 kb	56	No hit
SAMN46777823	GCA_054153495.1	CFSAN145334	2025	Environmental	USA	Ambiguous	ST148	IS5 , IS903	None	Complex	→ IS5 / IS903 → hypothetical → qseB → qseC → hypothetical → mcr-9.1 → wbuC	156 kb	65	No hit
		Note: * mean pseudo or uncompleted transfer element
